# Supplementary material
Source: HighWire-hosted journal article supplement (https://cmajopen-stage.highwire.org/highwire/filestream/90106/field_highwire_adjunct_files/0/open-2021-0318-1-at.pdf)
Supplement: open-2021-0318-1-at.pdf [file open-2021-0318-1-at.pdf]

## Appendix 1. Supplemental Methods

### Health and Lifestyle Surveys:

Several self-reported health and lifestyle questionnaires have been administered by Alberta's Tomorrow Project over time to collect information from participants. Questionnaires were in the English language and questions/content were adapted from multiple previously published surveys and studies. Modifications and new questions were created and validated if needed (1-3). Domains included personal health history (e.g. disease diagnoses), family health history, and health-related behaviours including cancer screening, smoking, alcohol, diet, and physical activity. A full description of the questionnaires, timelines for administration, and topic areas are available on the ATP website ([www.myatpresearch.ca](http://www.myatpresearch.ca)).

### Lipid analysis:

Lipid analysis of the stored samples (collected from 2008-2015) was conducted in 2017-2020 from 0.5mL of serum as part of a panel of biomarkers conducted on all Alberta's Tomorrow Project participant biosamples by Calgary Lab Services. Serum high-density lipoprotein cholesterol (HDL-C), triglyceride (TG), and total cholesterol (TC) were directly measured using enzymatic and colorimetric methods on a high-throughput Cobas 8000 system. Low-density lipoprotein cholesterol (LDL-C) was calculated according to the Friedewald formula [ $LDL-C = TC - HDL-C - (TG/2.2)$ ], whereas non-HDL-C and non-fasting remnant cholesterol (RC) were calculated from TC, LDL-C and HDL-C [ $non-HDL-C = TC - HDL-C$ ; and  $non-fasting RC = TC - (LDL-C + HDL-C)$ ] (4).

### References

1. Bryant H, Robson PJ, Ullman R, Friedenreich C, Dawe U. Population-based cohort development in Alberta, Canada: a feasibility study. *Chronic Dis Can*. 2006;27(2):51-9.
2. Robson PJ, Solbak NM, Haig TR, Whelan HK, Vena JE, Akawung AK, et al. Design, methods and demographics from phase I of Alberta's Tomorrow Project cohort: a prospective cohort profile. *CMAJ Open*. 2016;4(3):E515-e27
3. Ye M, Robson PJ, Eurich DT, Vena JE, Xu JY, Johnson JA. Cohort Profile: Alberta's Tomorrow Project. *Int J Epidemiol*. 2017;46(4):1097-81.
4. Nordestgaard BG, Langsted A, Mora S, Kolovou G, Baum H, Bruckert E, et al. Fasting is not routinely required for determination of a lipid profile: clinical and laboratory implications including flagging at desirable concentration cut-points-a joint consensus statement from the European Atherosclerosis Society and European Federation of Clinical Chemistry and Laboratory Medicine. *Eur Heart J*. 2016;37(25):1944-58.
